# Supplementary material
Source: HighWire-hosted journal article supplement (https://www.ajnr.org/content/suppl/2023/02/07/ajnr.A7782)
Supplement: 0679.pdf [file 0679.pdf]

\\USER\EDGE-MP2RAGE\EDGE-MP2RAGE\EDGE-MP2RAGE\SAG EDGE-MP2RAGE

TA: 9:02 PM: REF Voxel size: 0.8×0.8×0.4 mmPAT: 3 Rel. SNR: 1.00 : tfl

**Properties**

|                                               |                    |
|-----------------------------------------------|--------------------|
| Prio recon                                    | Off                |
| Load images to viewer                         | On                 |
| Inline movie                                  | Off                |
| Auto store images                             | On                 |
| Load images to stamp segments                 | On                 |
| Load images to graphic segments               | On                 |
| Auto open inline display                      | Off                |
| Auto close inline display                     | Off                |
| Start measurement without further preparation | Off                |
| Wait for user to start                        | Off                |
| Start measurements                            | Single measurement |

**Routine**

|                    |                                             |
|--------------------|---------------------------------------------|
| Slab group         | 1                                           |
| Slabs              | 1                                           |
| Dist. factor       | 50 %                                        |
| Position           | R0.2 A6.4 F3.5 mm                           |
| Orientation        | Sagittal                                    |
| Phase enc. dir.    | A >> P                                      |
| AutoAlign          | Head > Brain                                |
| Phase oversampling | 0 %                                         |
| Slice oversampling | 8.3 %                                       |
| Slices per slab    | 384                                         |
| FoV read           | 230 mm                                      |
| FoV phase          | 100.0 %                                     |
| Slice thickness    | 0.40 mm                                     |
| TR                 | 4500.0 ms                                   |
| TE                 | 2.21 ms                                     |
| Averages           | 1                                           |
| Concatenations     | 1                                           |
| Filter             | Raw filter, Distortion Corr.(3D), B1 filter |
| Coil elements      | AC                                          |

**Contrast - Common**

|                   |                   |
|-------------------|-------------------|
| TR                | 4500.0 ms         |
| TE                | 2.21 ms           |
| Magn. preparation | Non-sel. IR       |
| TI 1              | 800 ms            |
| TI 2              | 2700 ms           |
| Flip angle 1      | 5.0 deg           |
| Flip angle 2      | 4.0 deg           |
| Fat suppr.        | Water excit. fast |
| Water suppr.      | None              |

**Contrast - Dynamic**

|                 |                  |
|-----------------|------------------|
| Averages        | 1                |
| Averaging mode  | Long term        |
| Reconstruction  | Magnitude        |
| Measurements    | 1                |
| Multiple series | Each measurement |

**Resolution - Common**

|                  |         |
|------------------|---------|
| FoV read         | 230 mm  |
| FoV phase        | 100.0 % |
| Slice thickness  | 0.40 mm |
| Base resolution  | 296     |
| Phase resolution | 100 %   |
| Slice resolution | 50 %    |

**Resolution - Common**

|                       |     |
|-----------------------|-----|
| Phase partial Fourier | Off |
| Slice partial Fourier | Off |
| Interpolation         | Off |

**Resolution - iPAT**

|                     |            |
|---------------------|------------|
| PAT mode            | GRAPPA     |
| Accel. factor PE    | 3          |
| Ref. lines PE       | 32         |
| Accel. factor 3D    | 1          |
| Reference scan mode | Integrated |

**Resolution - Filter Image**

|                   |     |
|-------------------|-----|
| Image Filter      | Off |
| Distortion Corr.  | On  |
| Mode              | 3D  |
| Unfiltered images | Off |
| Prescan Normalize | Off |
| Normalize         | Off |
| B1 filter         | On  |
| Unfiltered images | Off |

**Resolution - Filter Rawdata**

|                   |     |
|-------------------|-----|
| Raw filter        | On  |
| Elliptical filter | Off |

**Geometry - Common**

|                    |                   |
|--------------------|-------------------|
| Slab group         | 1                 |
| Slabs              | 1                 |
| Dist. factor       | 50 %              |
| Position           | R0.2 A6.4 F3.5 mm |
| Orientation        | Sagittal          |
| Phase enc. dir.    | A >> P            |
| Slice oversampling | 8.3 %             |
| Slices per slab    | 384               |
| FoV read           | 230 mm            |
| FoV phase          | 100.0 %           |
| Slice thickness    | 0.40 mm           |
| TR                 | 4500.0 ms         |
| Multi-slice mode   | Single shot       |
| Series             | Ascending         |
| Concatenations     | 1                 |

**Geometry - AutoAlign**

|                     |                   |
|---------------------|-------------------|
| Slab group          | 1                 |
| Position            | R0.2 A6.4 F3.5 mm |
| Orientation         | Sagittal          |
| Phase enc. dir.     | A >> P            |
| AutoAlign           | Head > Brain      |
| Initial Position    | R0.2 A6.4 F3.5    |
| R                   | 0.2 mm            |
| A                   | 6.4 mm            |
| F                   | 3.5 mm            |
| Initial Rotation    | 0.01 deg          |
| Initial Orientation | Sagittal          |

**Geometry - Navigator****Geometry - Tim Planning Suite**

|                   |     |
|-------------------|-----|
| Set-n-Go Protocol | Off |
| Table position    | H   |

**Geometry - Tim Planning Suite**

|                  |      |
|------------------|------|
| Table position   | 0 mm |
| Inline Composing | Off  |

**System - Miscellaneous**

|                     |                |
|---------------------|----------------|
| Positioning mode    | REF            |
| Table position      | H              |
| Table position      | 0 mm           |
| MSMA                | S - C - T      |
| Sagittal            | L >> R         |
| Coronal             | P >> A         |
| Transversal         | F >> H         |
| Coil Combine Mode   | Sum of Squares |
| Save uncombined     | Off            |
| Matrix Optimization | Off            |
| AutoAlign           | Head > Brain   |
| Coil Select Mode    | Off - All      |

**System - Adjustments**

|                          |          |
|--------------------------|----------|
| B0 Shim mode             | Brain    |
| B1 Shim mode             | TrueForm |
| Confirm freq. adjustment | Off      |
| Assume Dominant Fat      | Off      |
| Assume Silicone          | Off      |
| Adjustment Tolerance     | Auto     |

**System - Adjust Volume**

|             |                   |
|-------------|-------------------|
| Position    | R0.2 A6.4 F3.5 mm |
| Orientation | Sagittal          |
| Rotation    | 0.01 deg          |
| A >> P      | 230 mm            |
| F >> H      | 230 mm            |
| R >> L      | 154 mm            |
| Reset       | Off               |

**System - pTx Volumes**

|              |          |
|--------------|----------|
| B1 Shim mode | TrueForm |
| Excitation   | Non-sel. |

**System - Tx/Rx**

|                     |                |
|---------------------|----------------|
| Frequency 1H        | 297.191514 MHz |
| Correction factor   | 1              |
| Gain                | High           |
| Img. Scale Cor.     | 1.000          |
| Reset               | Off            |
| ? Ref. amplitude 1H | 0.000 V        |

**Physio - Signal1**

|                 |           |
|-----------------|-----------|
| 1st Signal/Mode | None      |
| TR              | 4500.0 ms |
| Concatenations  | 1         |

**Physio - Cardiac**

|                   |                   |
|-------------------|-------------------|
| Magn. preparation | Non-sel. IR       |
| TI 1              | 800 ms            |
| TI 2              | 2700 ms           |
| Fat suppr.        | Water excit. fast |
| Dark blood        | Off               |
| FoV read          | 230 mm            |
| FoV phase         | 100.0 %           |
| Phase resolution  | 100 %             |

**Physio - PACE**

|               |     |
|---------------|-----|
| Resp. control | Off |
|---------------|-----|

**Physio - PACE**

|                |   |
|----------------|---|
| Concatenations | 1 |
|----------------|---|

**Inline - Common**

|                      |     |
|----------------------|-----|
| Subtract             | Off |
| Measurements         | 1   |
| StdDev               | Off |
| Save original images | On  |

**Inline - MIP**

|                      |     |
|----------------------|-----|
| MIP-Sag              | Off |
| MIP-Cor              | Off |
| MIP-Tra              | Off |
| MIP-Time             | Off |
| Save original images | On  |

**Inline - Composing**

|                   |     |
|-------------------|-----|
| Inline Composing  | Off |
| Distortion Corr.  | On  |
| Mode              | 3D  |
| Unfiltered images | Off |

**Inline - MapIt**

|                      |           |
|----------------------|-----------|
| Save original images | On        |
| MapIt                | T1 map    |
| Flip angle 1         | 5.0 deg   |
| Flip angle 2         | 4.0 deg   |
| Measurements         | 1         |
| TR                   | 4500.0 ms |
| TE                   | 2.21 ms   |

**Sequence - Part 1**

|                     |             |
|---------------------|-------------|
| Introduction        | On          |
| Dimension           | 3D          |
| Elliptical scanning | Off         |
| Reordering          | Linear      |
| Asymmetric echo     | Allowed     |
| Flow comp.          | No          |
| Multi-slice mode    | Single shot |
| Echo spacing        | 7 ms        |
| Bandwidth           | 200 Hz/Px   |

**Sequence - Part 2**

|                         |          |
|-------------------------|----------|
| RF pulse type           | Fast     |
| Gradient mode           | Fast     |
| Excitation              | Non-sel. |
| RF spoiling             | On       |
| Incr. Gradient spoiling | Off      |
| Turbo factor            | 208      |

**Sequence - Assistant**

|      |     |
|------|-----|
| Mode | Off |
|------|-----|
